# Supplementary material for: A CpG island hypermethylation profile of primary colorectal carcinomas and colon cancer cell lines
Source: PubMed Central journal article supplement (PMC526388; doi:10.1186/1476-4598-3-28), 2004-10-11
Supplement: 1476-4598-3-28-S1.pdf [file 1476-4598-3-28-S1.pdf]

**Table 4. PCR primers used for MSP.**

Abbreviations: M, methylated-specific primers; U, unmethylated-specific primers; Frg. Size, fragment size; An. Temp, annealing temperature.

\* The annealing temperature is given in degrees celcius.

| <b>Primer set</b> | <b>Sense primer</b>                     | <b>Antisense primer</b>               | <b>Frg. size, bp</b> | <b>An. temp*</b> |
|-------------------|-----------------------------------------|---------------------------------------|----------------------|------------------|
| hMLH1-M           | CGG ATA GCG ATT TTT AAC GCG TAA GC      | CGT CCC TCC CTA AAA CG                | 72                   | 53               |
| hMLH1-U           | TGG ATA GTG ATT TTT AAT GTG TAA GT      | ATC CCT CCC TAA AAC AAC TAC TAC CCA   | 71                   | 60               |
| MGMT-M            | TTT CGA CGT TCG TAG GTT TTC GC          | GCA CTC TTC CGA AAA CGA AAC G         | 81                   | 58               |
| MGMT-U            | TTT GTG TTT TGA TGT TTG TAG GTT TTT GT  | AAC TCC ACA CTC TTC CAA AAA CAA AAC A | 93                   | 58               |
| p16-M             | TTA TTA GAG GGT GGG GCG GAT CGC         | GAC CCC GAA CCG CGA CCG TAA           | 150                  | 63               |
| p16-U             | TTA TTA GAG GGT GGG GTG GAT TGT         | CAA CCC CAA CCA CAA CCA TAA           | 151                  | 64               |
| p14-M             | GTG TTA AAG GGC GGC GTA GC              | AAA ACC CTC ACT CGC GAC GA            | 122                  | 59               |
| p14-U             | TTT TTG GTG TTA AAG GGT GGT GTA GT      | CAC AAA AAC CCT CAC TCA CAA CAA       | 132                  | 59               |
| APC-M             | TAT TGC GGA GTG CGG GTC                 | TCG ACG AAC TCC CGA CGA               | 98                   | 63               |
| APC-U             | GTG TTT TAT TGT GGA GTG TGG GTT         | CCA ATC AAC AAA CTC CCA ACA A         | 108                  | 57               |
| E-Cad-M           | GGT GAA TTT TTA GTT AAT TAG CGG TAC     | CAT AAC TAA CCG AAA ACG CCG           | 204                  | 55               |
| E-Cad-U           | GGT AGG TGA ATT TTT AGT TAA TTA GTG GTA | ACC CAT AAC TAA CCA AAA ACA CCA       | 211                  | 58               |
